# Supplementary material for: Prodrugs for Skin Delivery of Menahydroquinone-4, an Active Form of Vitamin K2(20), Could Overcome the Photoinstability and Phototoxicity of Vitamin K2(20)
Source: MDPI journal article supplement (doi:10.3390/ijms20102548), 2019-05-24
Supplement: s1 [file s1]

## Supplemental Figure

(A)

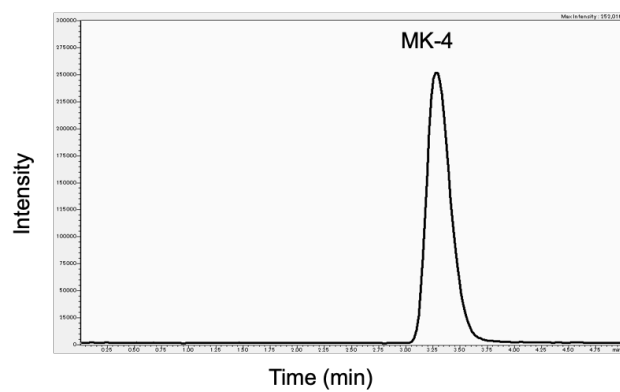

Irradiation

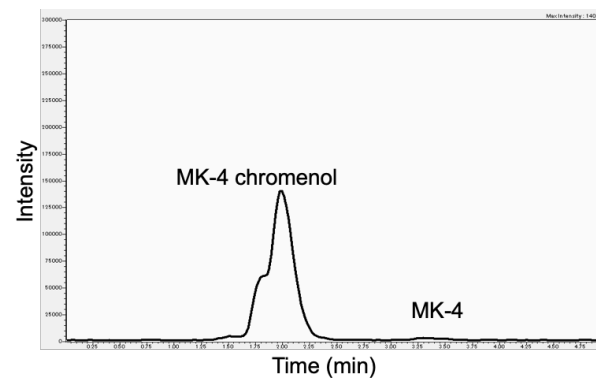

Shading

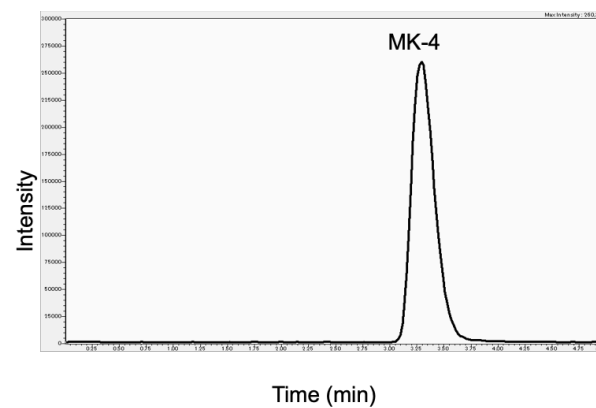

- MK-4 or MK-4 chromenol (m/z 445 → 187)
- MKH-DMG (m/z 619 → 58)
- MKH-mono-DMG (m/z 532 → 58)
- MKH-SUC (m/z 664 → 187)
- MKH-mono-SUC (m/z 564 → 187)

(B)

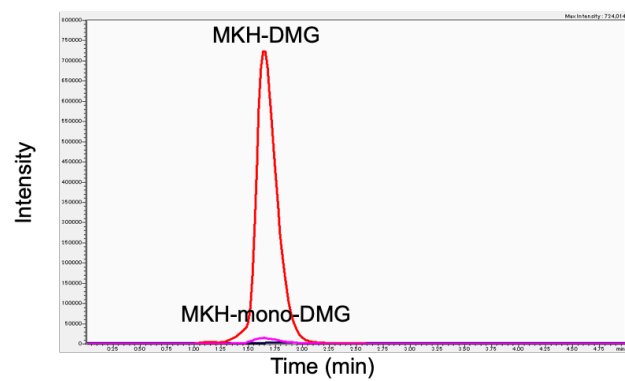

Irradiation

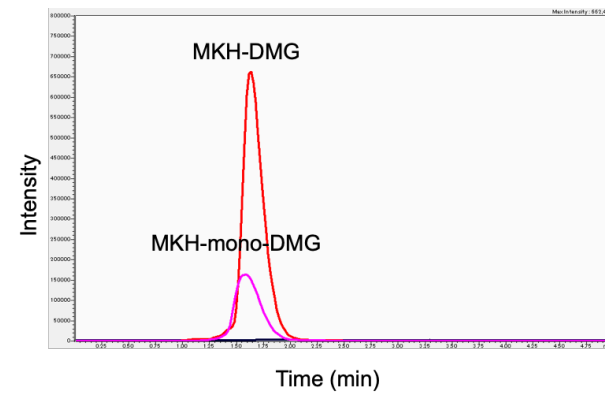

Shading

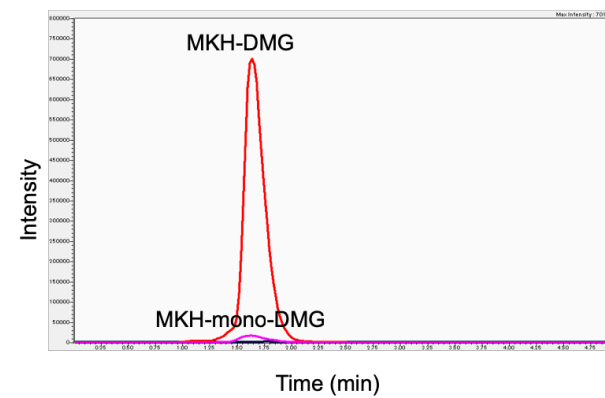

(C)

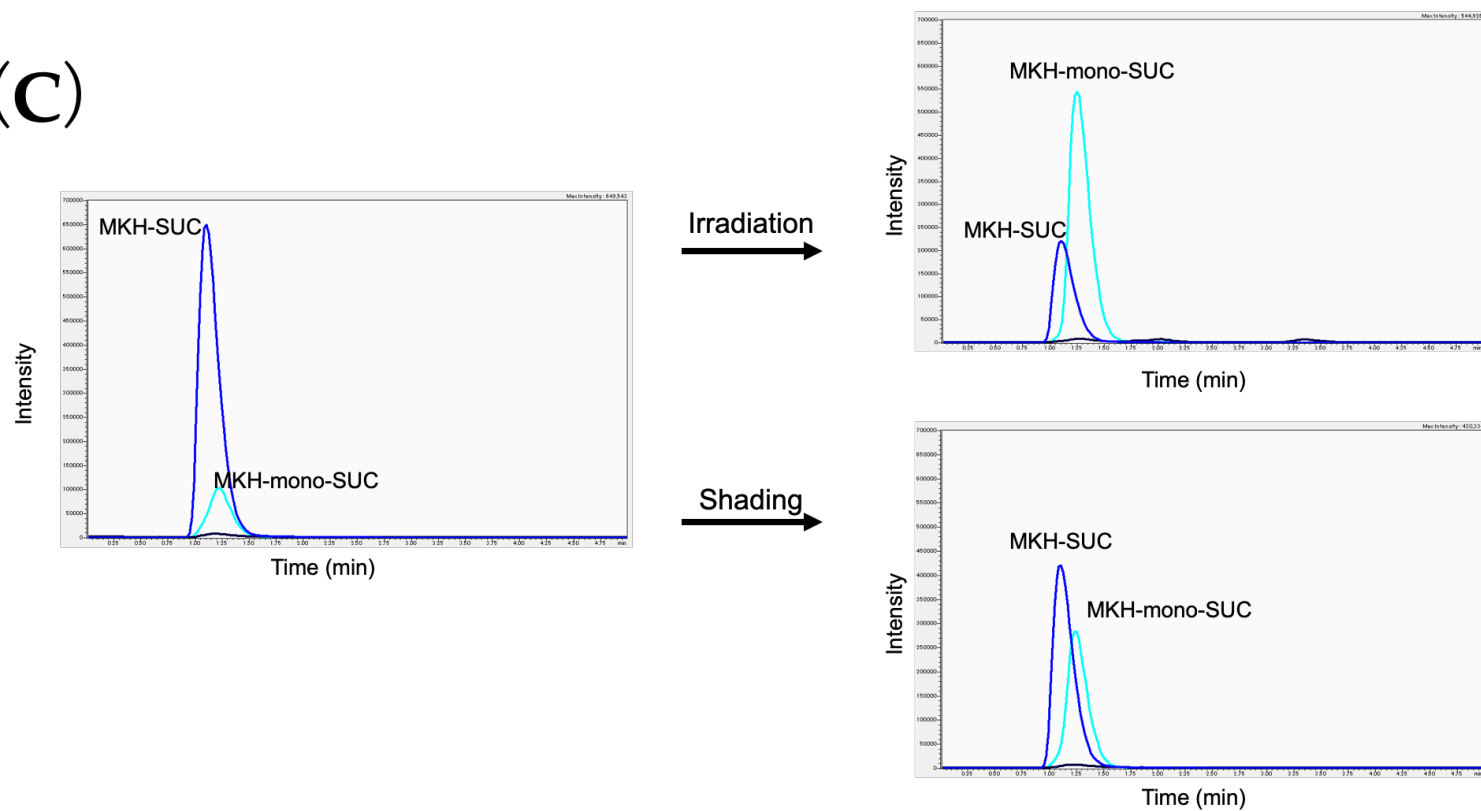

**Figure S1. Typical LC-MS/MS MRM chromatograms of MK-4 and MKH derivatives irradiated with artificial sunlight.**

(A) MK-4, (B) MKH-DMG and (C) MKH-SUC with and without shading in ethanol (1  $\mu$ M). Irradiated with artificial sunlight (12000 lx) for 30 min at 25  $^{\circ}$ C.
